# Supplementary material for: Dynamin‐Related Protein 1 Is Involved in Mitochondrial Damage, Defective Mitophagy, and NLRP3 Inflammasome Activation Induced by MSU Crystals
Source: Hindawi journal article supplement (doi:10.1155/2022/5064494), 2022-01-01

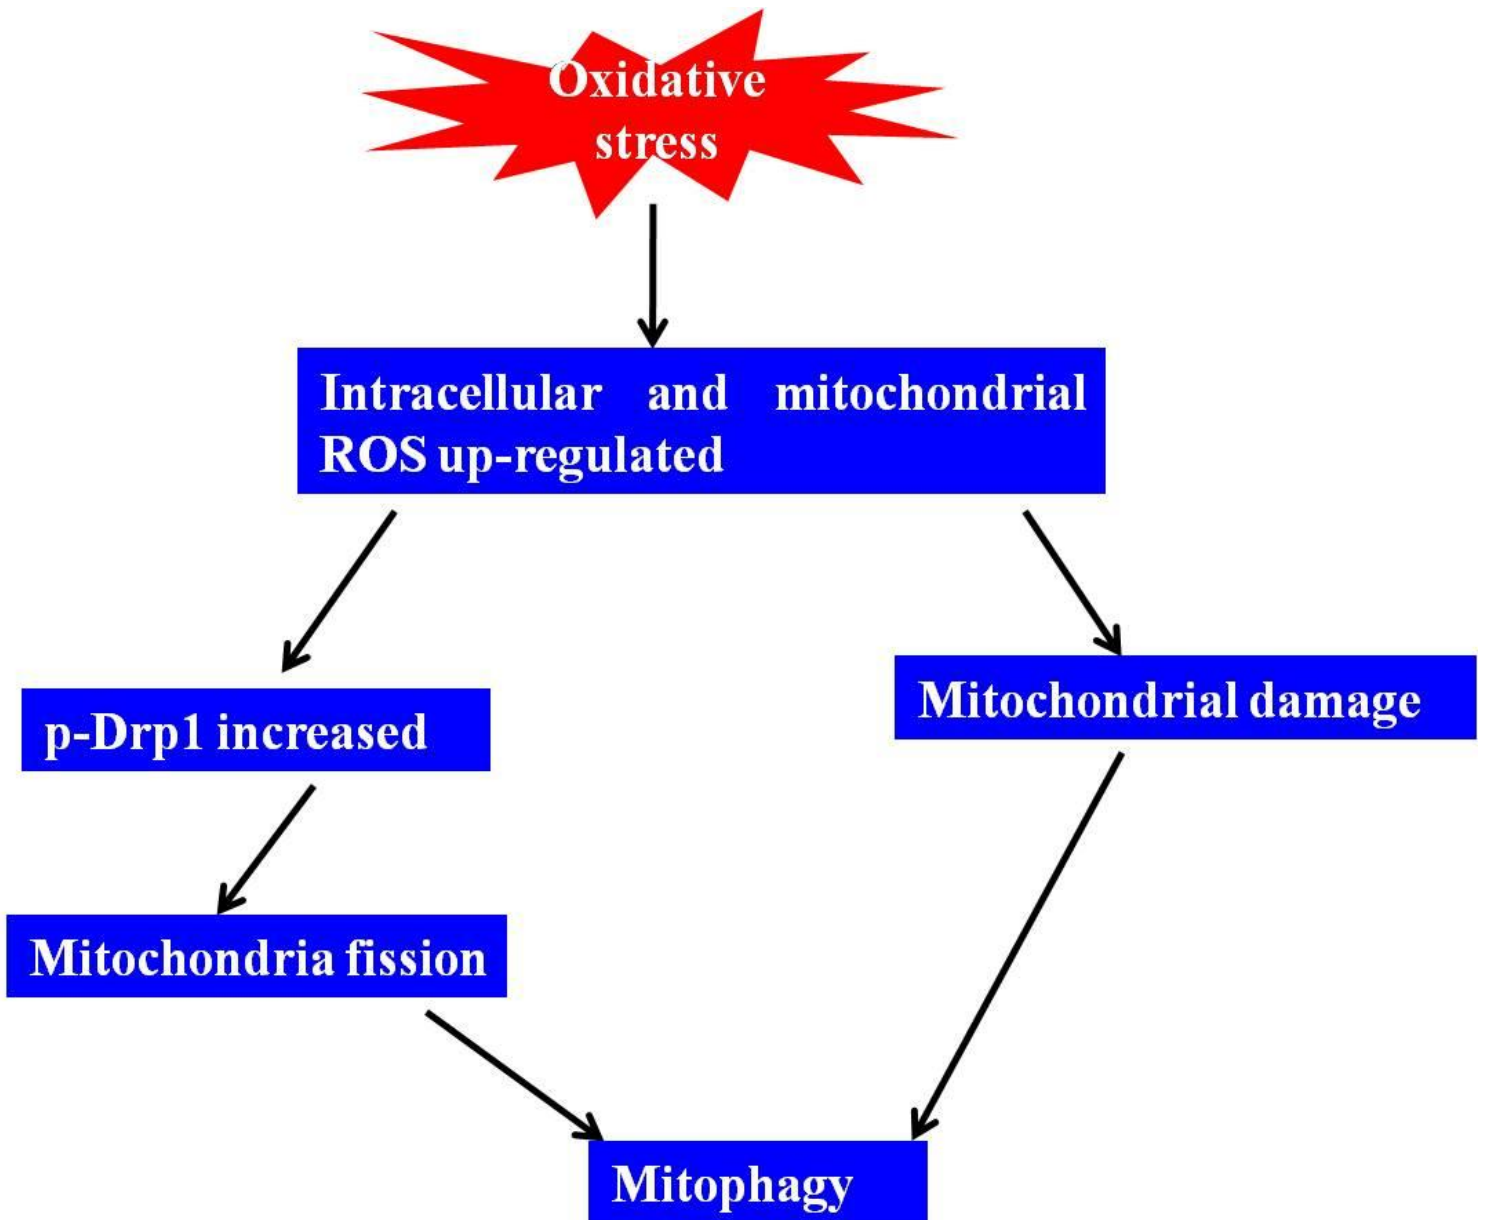

Supplement: f2 [file 5064494.f2.pdf]
